# Supplementary material for: TAB3 O-GlcNAcylation promotes metastasis of triple negative breast cancer
Source: PubMed Central journal article supplement (PMC5008402; doi:10.18632/oncotarget.8182), 2016-03-18
Supplement: oncotarget-07-22807-s001.pdf [file oncotarget-07-22807-s001.pdf]

## TAB3 O-GlcNAcylation promotes metastasis of triple negative breast cancer

### Supplementary Materials

#### SUPPLEMENTARY MATERIALS AND METHODS

##### Reagents and antibodies

GlcNAcstatin was obtained from GlycoBioChem. Human IL-1 $\beta$  was from Protech. Click-iT™ O-GlcNAc Enzymatic Labeling System and Click-iT™ Biotin Protein Analysis Detection Kit were obtained from Invitrogen. GlycoProfile  $\beta$ -elimination kit was obtained from Sigma. The antibodies used in this study include: rabbit monoclonal anti-Flag antibody, rabbit polyclonal anti-HA antibody (Sigma), rabbit polyclonal anti-GAPDH antibodies (Santa Cruz), rabbit monoclonal anti-TAB3 antibody, rabbit monoclonal anti-TAK1/phosphorylated-TAK1 antibodies, rabbit monoclonal anti-NF- $\kappa$ Bp65/phosphorylated-NF- $\kappa$ Bp65 antibodies, rabbit monoclonal anti-p38/phosphorylated-p38

antibodies mouse monoclonal anti-O-GlcNAcylation CTD110.6 antibody (Cell Signaling Technology). The rabbit polyclonal anti-Thr404 phosphorylated-TAB3 antibodies and rabbit polyclonal anti-Ser408 O-GlcNAcylation-TAB3 antibody were made according to the classic approach.

##### Cell proliferation assay

Cell proliferation was measured using the MTT assay. Briefly, cells were seeded onto 96-well cell culture cluster plates at a concentration of  $10^4$  cells/well in volumes of 100  $\mu$ L, and grown overnight. MTT Reagents were added to the subset of wells, and then incubated for 2 hours at 37°C, the DMSO was added to detergent. Absorbances were quantified using an automated plate reader at 370 nm.

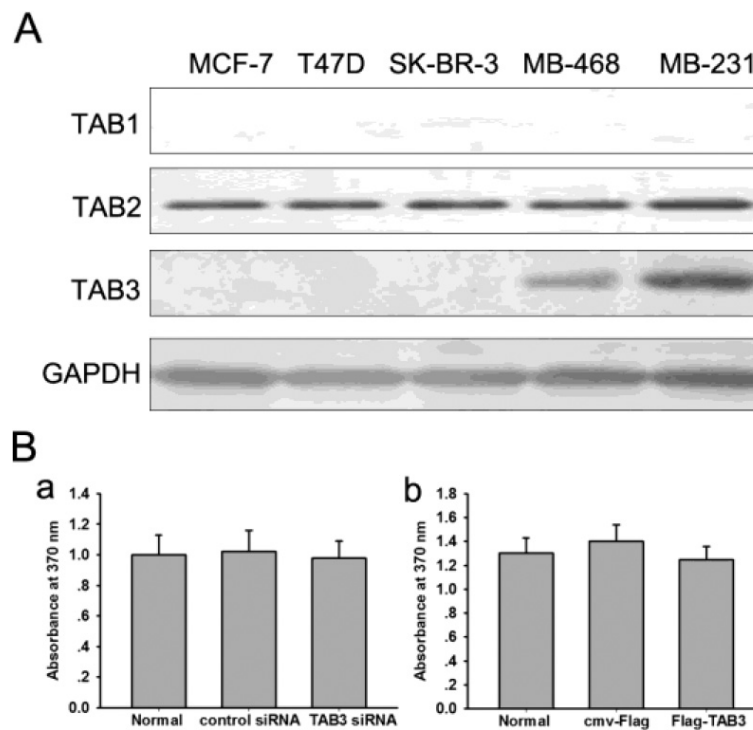

**Supplementary Figure S1: Disturbed the TAB3 expression has no effect in TNBC cell proliferation.** (A) A representative Western blot image of TAB1, TAB2 and TAB3 expression in 5 human breast cancer cell lines. (B) Equal numbers of indicated stably transfected MAD-MB-468 cells (a) and MAD-MB-231 cells (b) were seed on 96 well plates. MTT assay shown the cell viabilities when TAB3 was knockdown or overexpression. Data were shown as means  $\pm$  SEM.

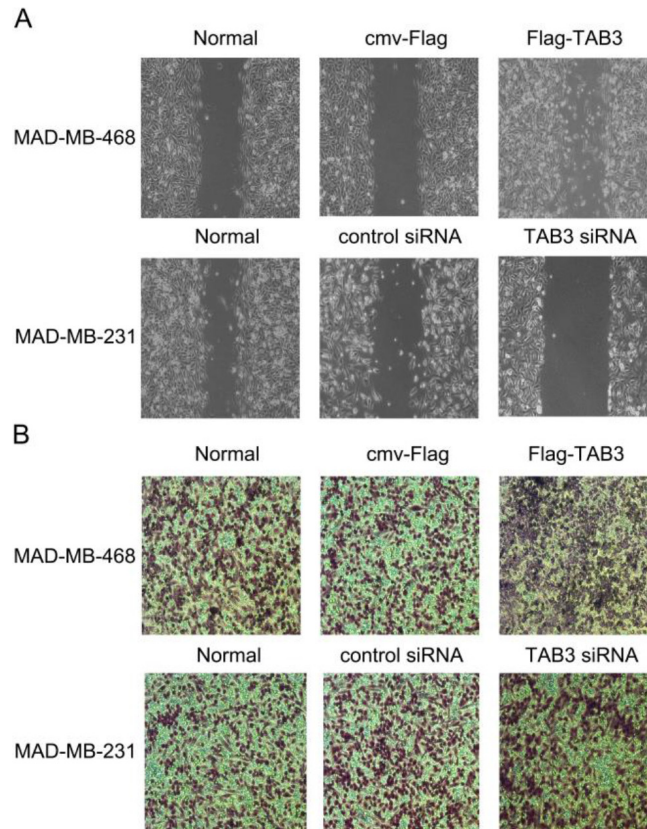

**Supplementary Figure S2: TAB3 promoted TNBC cell migration and invasion *in vitro*.** (A) Equal numbers of indicated stably transfected MAD-MB-468 cells and MAD-MB-231 cells seeded into six-well tissue culture plates. Wound healing assay was performed to detect cell migration ability. (B)  $10^6$  stably transfected MAD-MB-468 cells and MAD-MB-231 cells cultured in matrigel chambers. Transwell assay was performed to detect cell invasion ability.

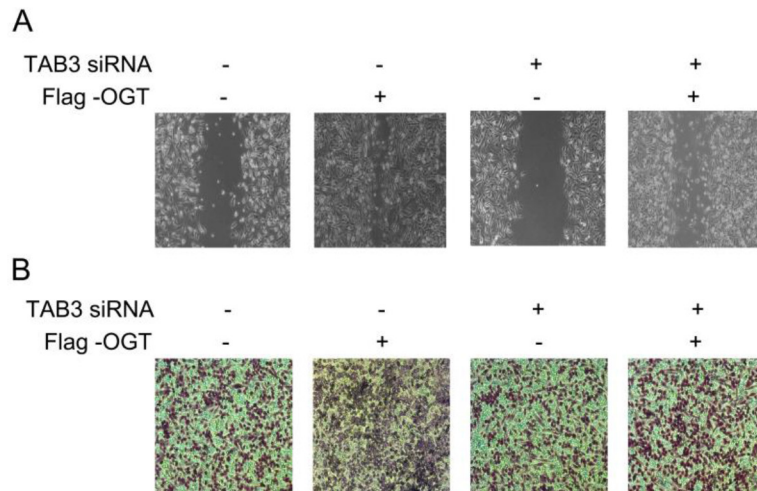

**Supplementary Figure S3: TAB3 involved in OGT promoted TNBC cells migration and invasion.** MDA-MB-231 cells were transfected with Flag-OGT and/or TAB3 siRNA vector. Cell migration (A) and invasion (B) were assessed as described.

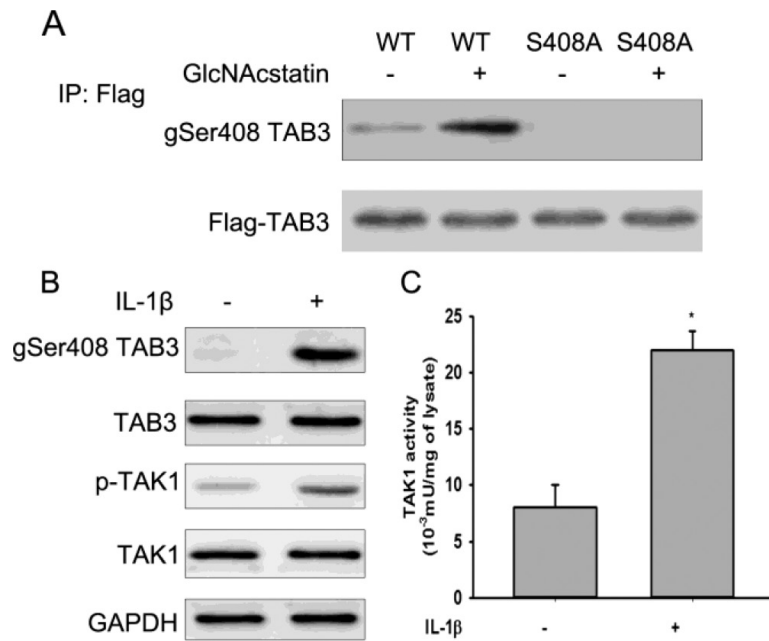

**Supplementary Figure S4: IL-1 $\beta$  promotes TAB3 O-GlcNAcylation and TAK1 activation in TNBC cells.** (A) The specificity of the antibody which against TAB3 O-GlcNAc S408 was determined using cell lysates prepared from cells transfected with WT TAB3 and S408A TAB3 treated with or without 1 mM GlcNAcstatin. (B) MAD-MB-231 cells were serum starved for 6 h, and then stimulated by IL-1 $\beta$  for 15 min. Cell lysate were immunoblotted for O-GlcNAcylation-TAB3 (gSer408 TAB3), phosphorylated TAK1 and total TAB3 and TAK1. Densitometries for TAB3 O-GlcNAcylation and TAK1 phosphorylation were normalized against total TAB3 and TAK1 levels. (C) The TAK1 complexes were pulled down from the cell extracts (1 mg of protein extract) using glutathione-sepharose beads, and TAK1 activity assays were performed as described in the materials and methods section.

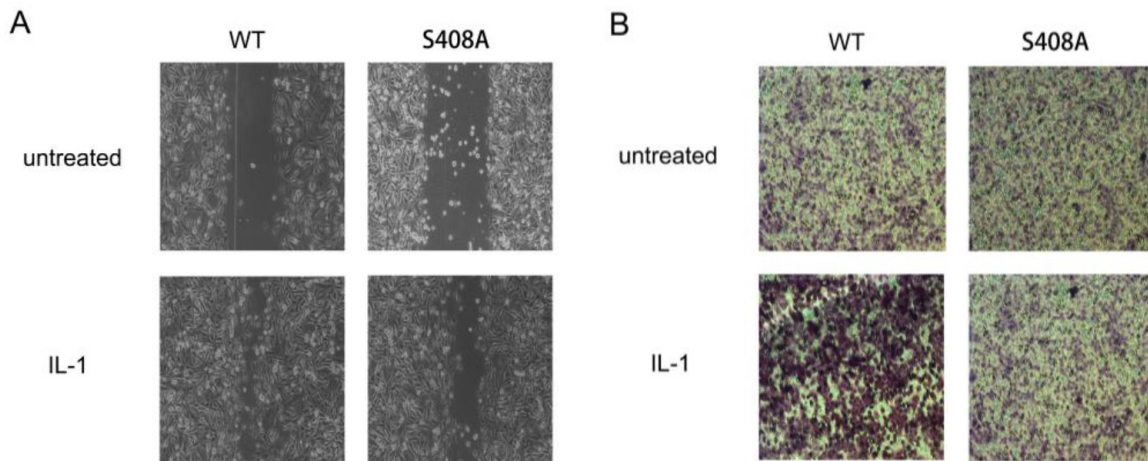

**Supplementary Figure S5: TAB3 O-GlcNAcylation promoted TNBC cell migration and invasion *in vitro*.** (A) Equal numbers of WT and S408A TAB3 stably transfected MAD-MB-231 cells seeded into six-well culture plates in the presence or absence of IL-1 $\beta$ . Wound healing assay was performed to detect cell migration viability. (B) 10<sup>6</sup> stably transfected and MAD-MB-231 cells cultured in matrigel chambers with or without IL-1 $\beta$ . Transwell assay was performed to detect cell invasion ability.

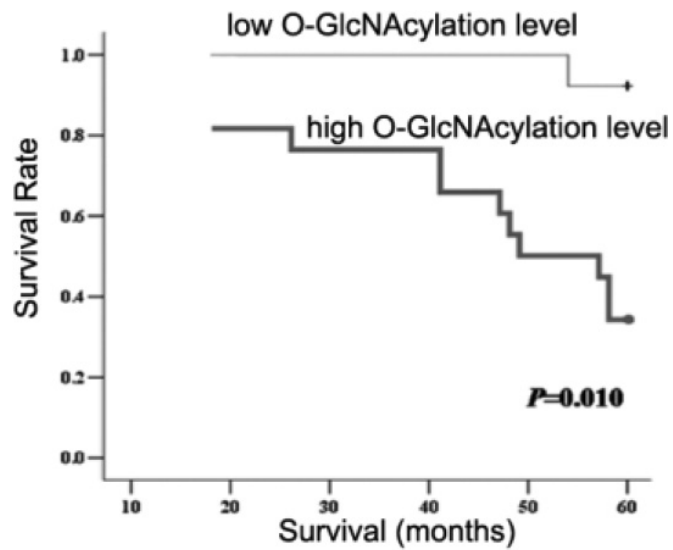

**Supplementary Figure S6: The total O-GlcNAcylation level is correlated with the poorer prognosis in TNBC patients.** Kaplan-Meier survival curve of breast cancer patients with low and high total O-GlcNAcylation level.

**Supplementary Table S1: Primers used in the manuscript**

|                                       |                                  |
|---------------------------------------|----------------------------------|
| For cloning the human GST-TAB3        |                                  |
| Forward primer                        | CCGGATTCATGGCTTATTCAGAAGAGCATA   |
| Reversed primer                       | CCGCTCGAGCTACAGTTCAATCTCGAATGTC  |
| For cloning the human Flag-TAB3       |                                  |
| Forward primer                        | CCGGAATTCGGATGTCCCGCAGCGCGGCGGCC |
| Reversed primer                       | CCGCTCGAGACAGTTCAATCTCGAATGTC    |
| For cloning the human HA/Flag-OGT     |                                  |
| Forward primer                        | CCGGAATTCATGTCCCGCAGCGCGGCGGCC   |
| Reversed primer                       | CCGCTCGAGACTACAGTTCAATCTCGAATGTC |
| For cloning the human Flag-S408A TAB3 |                                  |
| Forward primer                        | TCCCGCAGCGCGGCGGCCGACATG         |
| Reversed primer                       | TACAGTTCAATCTCGAAGGTCGAG         |
| For cloning the human Flag-T404A TAB3 |                                  |
| Forward primer                        | GCTTATTCAGAAGAGCATACGAGCG        |
| Reversed primer                       | CCGAGATCCTCCAGGTCAGTTAAGT        |
